# Supplementary material for: Subcritical Water Treatment for Valorization of the Red Algae Residue after Agar Extraction: Scale-Up from Laboratory to Pilot Plant
Source: PubMed Central journal article supplement (PMC9983305; doi:10.1021/acs.iecr.2c04132), 2023-02-16
Supplement: ie2c04132_si_001.pdf [file ie2c04132_si_001.pdf]

**Supporting Information. Subcritical water treatment for valorization of the red algae residue after agar extraction. Scale-up from laboratory to pilot plant.**

Esther Trigueros\*, Cipriano Ramos, Patricia Alonso-Riaño, Sagrario Beltrán and María Teresa Sanz

Department of Biotechnology and Food Science, Chemical Engineering Division, University of Burgos, Plza. Misael Bañuelos s/n 09001 Burgos, Spain.

\*Corresponding author: Esther Trigueros, e-mail address: [etrigueros@ubu.es](mailto:etrigueros@ubu.es)

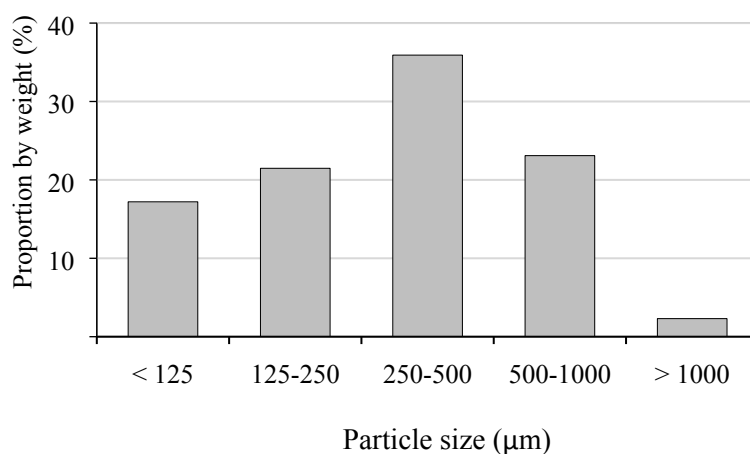

**Figure S1.** Particle-size distribution from dried macroalga residue (DMR).

(a)

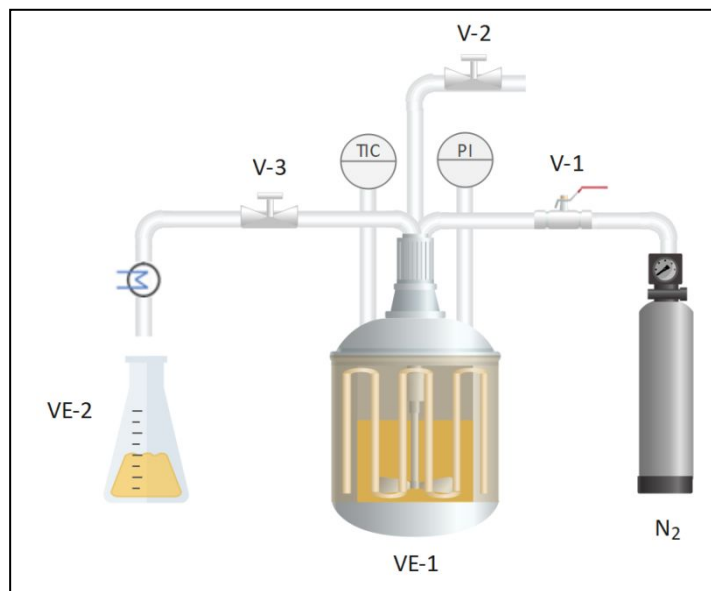

(b)

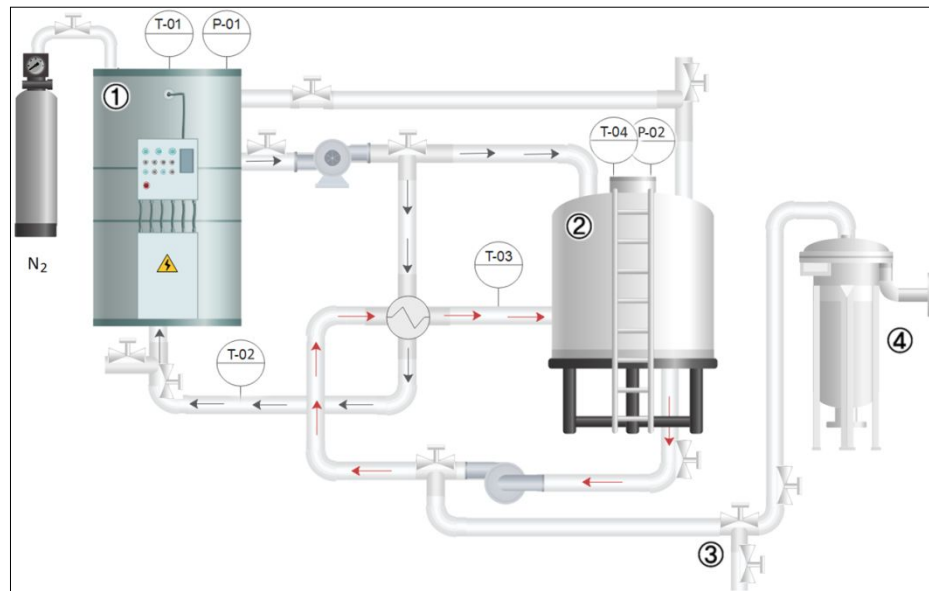

**Figure S2.** (a) Scheme of the lab-scale SW equipment. VE-1: reactor (0.5 L); VE-2: sample collector; V-1: pressurization valve; V-2: pressure relief valve; V-3: needle valve. (b) Diagram of the pilot-scale subcritical water plant designed and built at Hiperbaric's facilities. 1: steam boiler preheater and water tank; 2: reactor (25 L); 3: liquid extracts collector; 4: filtration tank.

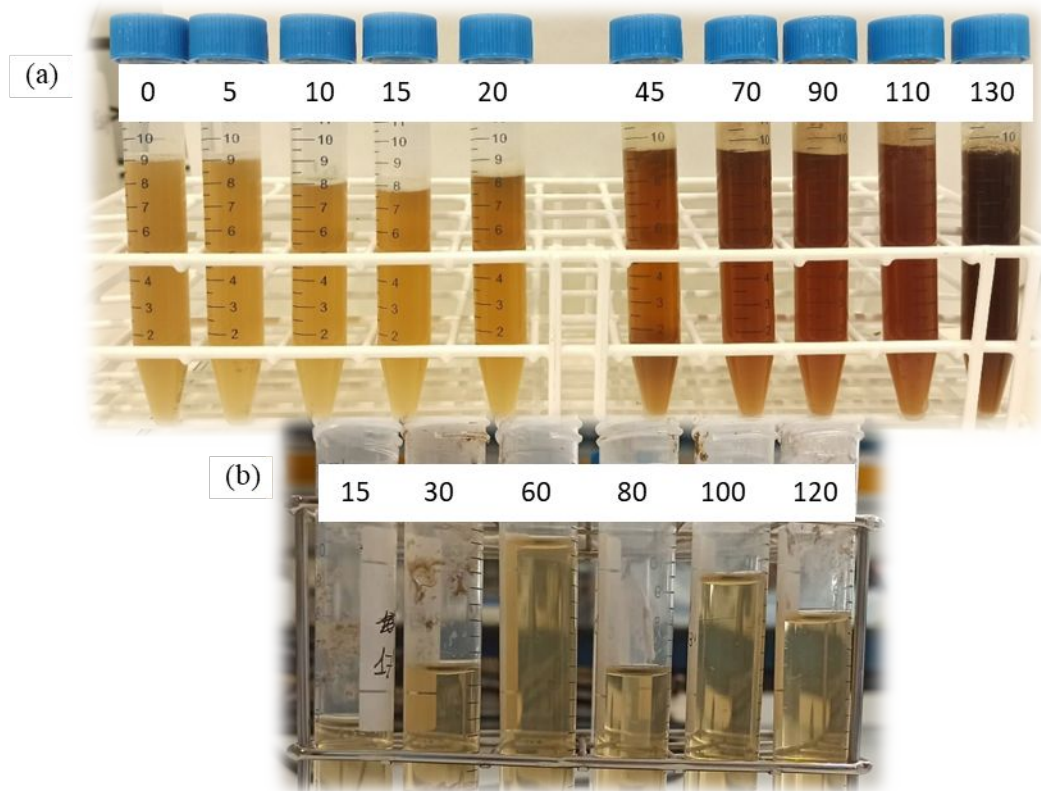

**Figure S3.** Liquid extracts collected at the different time intervals from DMR<sub><500</sub> after subcritical water treatment at lab-scale at 175 °C (a) and 130 °C (b) for colour observation. (Numbers above the tubes indicate the minute at which they were collected).
